# Supplementary material
Source: publisher site journal article supplement (https://www.dovepress.com/article/572396)
Supplement: Supplementary file 1 [file 572396%20Revised%20Supplementary%20Material.docx]

**Supplementary Table S1.** B-cell lymphoma cell lines, subtypes, and culture conditions.

| **Cell Line** | **Subtype** | **Culture Conditions** |
| --- | --- | --- |
| **ULA** | Likely DLBCL | IMDM + Opti-MEM (1:1) + 20% (v/v) FBS |
| **RI-1** | DLBCL, GCB | RPMI-1640 + 10% (v/v) FBS |
| **Daudi** | Burkitt lymphoma | RPMI-1640 + 10% (v/v) FBS |
| **Raji** | Burkitt lymphoma | RPMI-1640 + 10% (v/v) FBS |
| **NU-DUL-1** | DLBCL, ABC | RPMI-1640 + 10% (v/v) FBS |
| **OCI-LY18** | DLBCL, ABC | RPMI-1640 + 10% (v/v) FBS |
| **OCI-LY19** | DLBCL, GCB | alpha-MEM (with nucleosides) + 10% (v/v) FBS |
| **SU-DHL-6** | DLBCL, GCB | RPMI-1640 + 10% (v/v) FBS |
| **SU-DHL-10** | DLBCL, ABC | RPMI-1640 + 20% (v/v) FBS |

**Abbreviation: DLBCL**: Diffuse Large B-Cell Lymphoma; **GCB**: Germinal Center B-cell-like; **ABC**: Activated B-cell-like.

**Supplementary Figure S1**

**A**

Jurkat

Merge

DAPI

CD47


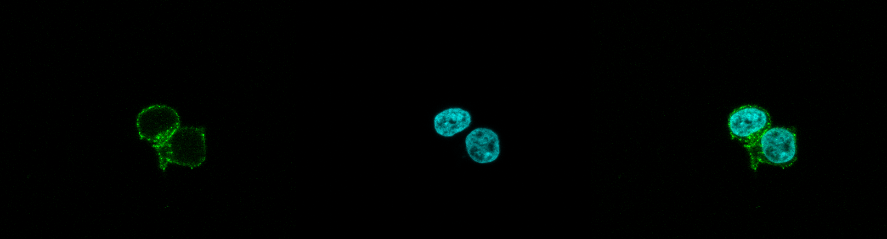


Ctrl


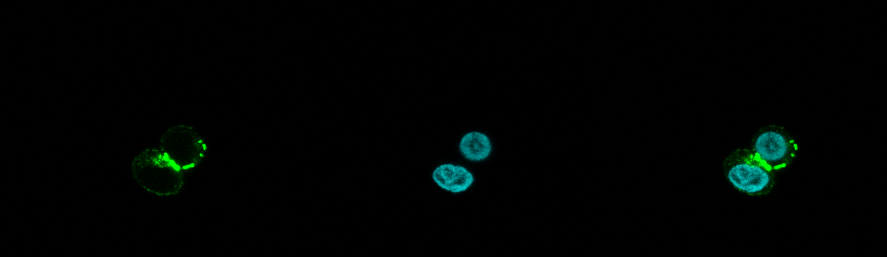


CO-005


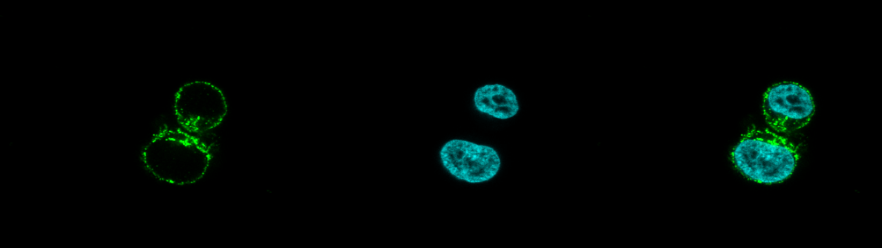


Magrolimab


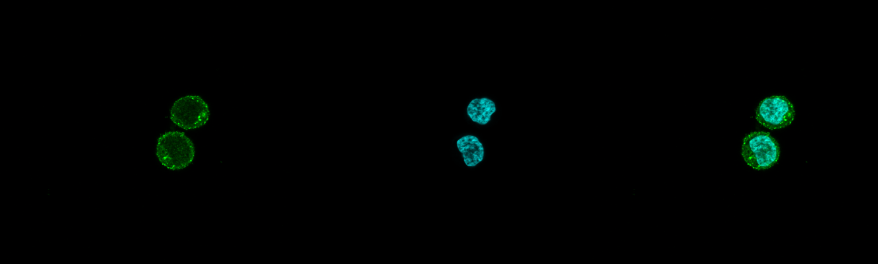


B6H12


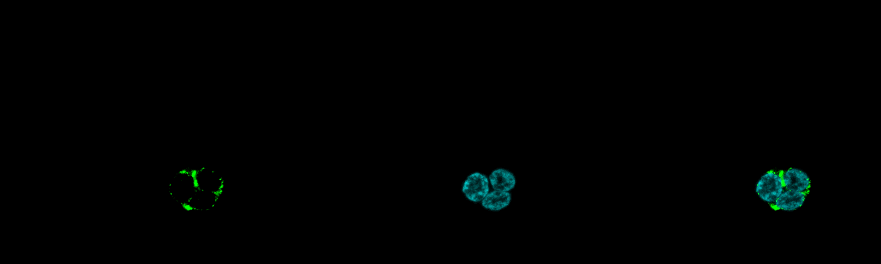


CO-004

**B**


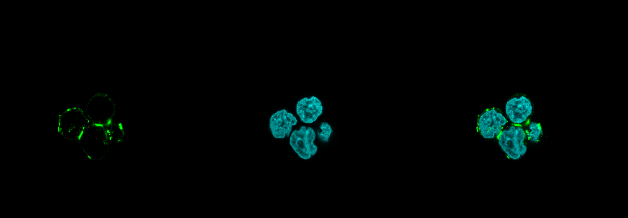

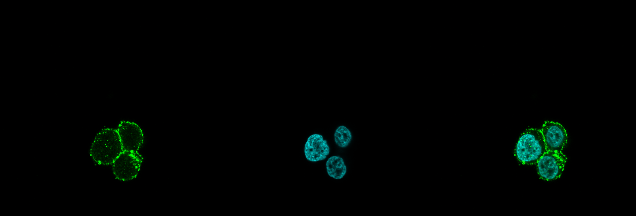

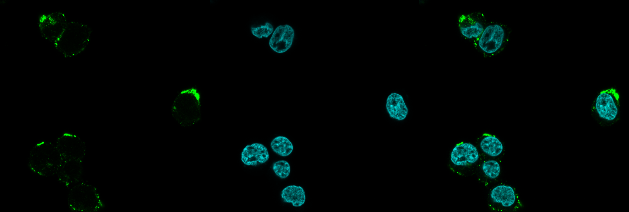

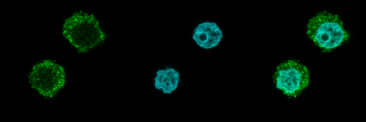

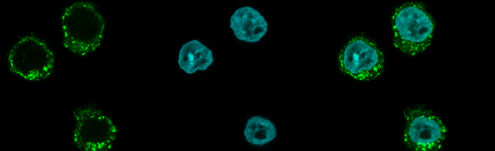

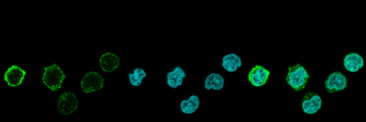


CD47

DAPI

Merge

MOLT-4

CD47

DAPI

Merge

KG-1a

CO-005

CO-005

CO-005

Ctrl

Ctrl

REH

Ctrl

CO-005 triggers CD47 receptor capping in **(A)** Jurkat cells were either treated with 1µg/ml of CO-005, Magrolimab, B6H12, or CO-004 for 3 hours or untreated (Ctrl). **(B)** MOLT-4, KG-1a, and REH cell lines were treated with 1µg/ml CO-005 for 3 hours or untreated. Receptor distribution was visualized by confocal microscopy following immunofluorescence staining.
